# Supplementary material for: Camelids and Cattle Are Dead-End Hosts for Peste-des-Petits-Ruminants Virus
Source: MDPI journal article supplement (doi:10.3390/v11121133), 2019-12-08
Supplement: s1 [file s1]

**Real-time quantitative reverse transcription-PCR results (Cq values) of alpacas (A) and llamas (L) after experimental intranasal infection with PPRV lineage IV Kurdistan/2011 strain obtained during South American camelid (SAC)-goat and llama transmission trial 2 using PPRV-PCR assay of Batten et al. 2011.**

**oronasal swabs**

| days post infection | 0  | 3     | 4     | 5     | 6     | 7     | 8     | 9  | 10    | 12 | 14 | 17 | 21  | 25 | 28 |
|---------------------|----|-------|-------|-------|-------|-------|-------|----|-------|----|----|----|-----|----|----|
| A1                  | 45 | 39.14 | 39.35 | 38.93 | 45    | 36.58 | 45    | 45 | 37.55 | 45 | 45 | 45 | N/A | 45 | 45 |
| A2                  | 45 | 45    | 45    | 45    | 38.13 | 45    | 33.85 | 45 | 45    | 45 | 45 | 45 | N/A | 45 | 45 |
| A3                  | 45 | 45    | 37.36 | 45    | 38.2  | 45    | 45    | 45 | 45    | 45 | 45 | 45 | N/A | 45 | 45 |
| L4                  | 45 | 45    | 45    | 45    | 45    | 45    | 45    | 45 | 45    | 45 | 45 | 45 | N/A | 45 | 45 |
| L5                  | 45 | 45    | 38.37 | 37.69 | 38.3  | 45    | 45    | 45 | 37.51 | 45 | 45 | 45 | N/A | 45 | 45 |
| L6                  | 45 | 45    | 45    | 45    | 45    | 45    | 45    | 45 | 45    | 45 | 45 | 45 | N/A | 45 | 45 |

**conjunctival swabs**

| days post infection | 0  | 3  | 4  | 5  | 6  | 7  | 8  | 9  | 10 | 12 | 14 | 17 | 21  | 25 | 28 |
|---------------------|----|----|----|----|----|----|----|----|----|----|----|----|-----|----|----|
| A1                  | 45 | 45 | 45 | 45 | 45 | 45 | 45 | 45 | 45 | 45 | 45 | 45 | N/A | 45 | 45 |
| A2                  | 45 | 45 | 45 | 45 | 45 | 45 | 45 | 45 | 45 | 45 | 45 | 45 | N/A | 45 | 45 |
| A3                  | 45 | 45 | 45 | 45 | 45 | 45 | 45 | 45 | 45 | 45 | 45 | 45 | N/A | 45 | 45 |
| L4                  | 45 | 45 | 45 | 45 | 45 | 45 | 45 | 45 | 45 | 45 | 45 | 45 | N/A | 45 | 45 |
| L5                  | 45 | 45 | 45 | 45 | 45 | 45 | 45 | 45 | 45 | 45 | 45 | 45 | N/A | 45 | 45 |
| L6                  | 45 | 45 | 45 | 45 | 45 | 45 | 45 | 45 | 45 | 45 | 45 | 45 | N/A | 45 | 45 |

**fecal swabs**

| days post infection | 0  | 3  | 4  | 5  | 6  | 7  | 8  | 9  | 10 | 12 | 14    | 17 | 21  | 25 | 28 |
|---------------------|----|----|----|----|----|----|----|----|----|----|-------|----|-----|----|----|
| A1                  | 45 | 45 | 45 | 45 | 45 | 45 | 45 | 45 | 45 | 45 | 45    | 45 | N/A | 45 | 45 |
| A2                  | 45 | 45 | 45 | 45 | 45 | 45 | 45 | 45 | 45 | 45 | 45    | 45 | N/A | 45 | 45 |
| A3                  | 45 | 45 | 45 | 45 | 45 | 45 | 45 | 45 | 45 | 45 | 45    | 45 | N/A | 45 | 45 |
| L4                  | 45 | 45 | 45 | 45 | 45 | 45 | 45 | 45 | 45 | 45 | 45    | 45 | N/A | 45 | 45 |
| L5                  | 45 | 45 | 45 | 45 | 45 | 45 | 45 | 45 | 45 | 45 | 45    | 45 | N/A | 45 | 45 |
| L6                  | 45 | 45 | 45 | 45 | 45 | 45 | 45 | 45 | 45 | 45 | 38.61 | 45 | N/A | 45 | 45 |

**whole blood**

| days post infection | 0  | 3   | 4  | 5   | 6  | 7   | 8     | 9   | 10 | 12 | 14 | 17 | 21 | 24 | 28 |
|---------------------|----|-----|----|-----|----|-----|-------|-----|----|----|----|----|----|----|----|
| A1                  | 45 | N/A | 45 | N/A | 45 | N/A | 45    | N/A | 45 | 45 | 45 | 45 | 45 | 45 | 45 |
| A2                  | 45 | N/A | 45 | N/A | 45 | N/A | 45    | N/A | 45 | 45 | 45 | 45 | 45 | 45 | 45 |
| A3                  | 45 | N/A | 45 | N/A | 45 | N/A | 37.68 | N/A | 45 | 45 | 45 | 45 | 45 | 45 | 45 |
| L4                  | 45 | N/A | 45 | N/A | 45 | N/A | 45    | N/A | 45 | 45 | 45 | 45 | 45 | 45 | 45 |
| L5                  | 45 | N/A | 45 | N/A | 45 | N/A | 45    | N/A | 45 | 45 | 45 | 45 | 45 | 45 | 45 |
| L6                  | 45 | N/A | 45 | N/A | 45 | N/A | 45    | N/A | 45 | 45 | 45 | 45 | 45 | 45 | 45 |

**serum**

| days post infection | 0  | 3   | 4  | 5   | 6  | 7   | 8  | 9   | 10 | 12 | 14 | 17 | 21 | 24 | 28 |
|---------------------|----|-----|----|-----|----|-----|----|-----|----|----|----|----|----|----|----|
| A1                  | 45 | N/A | 45 | N/A | 45 | N/A | 45 | N/A | 45 | 45 | 45 | 45 | 45 | 45 | 45 |
| A2                  | 45 | N/A | 45 | N/A | 45 | N/A | 45 | N/A | 45 | 45 | 45 | 45 | 45 | 45 | 45 |
| A3                  | 45 | N/A | 45 | N/A | 45 | N/A | 45 | N/A | 45 | 45 | 45 | 45 | 45 | 45 | 45 |
| L4                  | 45 | N/A | 45 | N/A | 45 | N/A | 45 | N/A | 45 | 45 | 45 | 45 | 45 | 45 | 45 |
| L5                  | 45 | N/A | 45 | N/A | 45 | N/A | 45 | N/A | 45 | 45 | 45 | 45 | 45 | 45 | 45 |
| L6                  | 45 | N/A | 45 | N/A | 45 | N/A | 45 | N/A | 45 | 45 | 45 | 45 | 45 | 45 | 45 |

N/A, not analysed
