# Supplementary material for: Camelids and Cattle Are Dead-End Hosts for Peste-des-Petits-Ruminants Virus
Source: MDPI journal article supplement (doi:10.3390/v11121133), 2019-12-08
Supplement: s1 [file s1]

**Real-time quantitative reverse transcription-PCR results (Cq values) of cattle (C) after experimental intranasal infection with PPRV lineage IV Kurdistan/2011 strain obtained during cattle-goat transmission trial 1 using PPRV-PCR assay of Batten et al. 2011.**

**oronasal swabs**

| days post infection | 0  | 1     | 2     | 3     | 4     | 5     | 6     | 7     | 8     | 9     | 10 | 11 | 12 | 13 | 14 | 16 |
|---------------------|----|-------|-------|-------|-------|-------|-------|-------|-------|-------|----|----|----|----|----|----|
| C1                  | 45 | 45    | 36.43 | 37    | 31.06 | 38.07 | 30.73 | 35.35 | 34.51 | 45    | 45 | 45 | 45 | 45 | 45 | 45 |
| C2                  | 45 | 45    | 45    | 45    | 34.72 | 38.07 | 45    | 35.68 | 36.74 | 37.72 | 45 | 45 | 45 | 45 | 45 | 45 |
| C3                  | 45 | 37.53 | 29.46 | 34.54 | 45    | 28.22 | 37.09 | 31.43 | 33.45 | 45    | 45 | 45 | 45 | 45 | 45 | 45 |

**conjunctival swabs**

| days post infection | 0  | 1  | 2  | 3  | 4  | 5     | 6     | 7     | 8     | 9     | 10    | 11 | 12 | 13 | 14 | 16 |
|---------------------|----|----|----|----|----|-------|-------|-------|-------|-------|-------|----|----|----|----|----|
| C1                  | 45 | 45 | 45 | 45 | 45 | 38.25 | 35.67 | 35.24 | 36.93 | 36.16 | 38.13 | 45 | 45 | 45 | 45 | 45 |
| C2                  | 45 | 45 | 45 | 45 | 45 | 45    | 32.49 | 32.23 | 36.16 | 36.57 | 45    | 45 | 45 | 45 | 45 | 45 |
| C3                  | 45 | 45 | 45 | 45 | 45 | 38.55 | 35.93 | 35.16 | 34.6  | 45    | 45    | 45 | 45 | 45 | 45 | 45 |

**fecal swabs**

| days post infection | 0  | 1  | 2  | 3  | 4  | 5  | 6  | 7     | 8     | 9  | 10 | 11 | 12 | 13 | 14 | 16 |
|---------------------|----|----|----|----|----|----|----|-------|-------|----|----|----|----|----|----|----|
| C1                  | 45 | 45 | 45 | 45 | 45 | 45 | 45 | 38.28 | 38.09 | 45 | 45 | 45 | 45 | 45 | 45 | 45 |
| C2                  | 45 | 45 | 45 | 45 | 45 | 45 | 45 | 38.08 | 45    | 45 | 45 | 45 | 45 | 45 | 45 | 45 |
| C3                  | 45 | 45 | 45 | 45 | 45 | 45 | 45 | 35.48 | 35.58 | 45 | 45 | 45 | 45 | 45 | 45 | 45 |

**whole blood**

[illegible]

## serum

[illegible]
